# Supplementary material for: Energetic metal–organic frameworks achieved from furazan and triazole ligands: synthesis, crystal structure, thermal stability and energetic performance
Source: Royal Society of Chemistry journal article supplement (doi:10.1039/d1nj04486a), 2021-01-01
Supplement: d1nj04486a1.pdf [file d1nj04486a1.pdf]

## Supporting Information

### Energetic metal–organic frameworks achieved from furazan and triazole ligand:

#### synthesis, crystal structure, thermal stability and energetic performance

Lishan Gong,<sup>a</sup> Guo Chen,<sup>a</sup> Yue Liu,<sup>a</sup> Tingwei Wang,<sup>b</sup> Jianguo Zhang,<sup>b</sup> Xiaoyi Yi,<sup>a</sup> Piao He<sup>\*a</sup>

|                                                                                                                                                                         |
|-------------------------------------------------------------------------------------------------------------------------------------------------------------------------|
| <b>INDEX</b>                                                                                                                                                            |
| <b>Supplementary Figure 1.</b> Single-crystal X-ray structure of complex 1.                                                                                             |
| <b>Supplementary Table 1.</b> Crystal data and structure refinement for complex 1.                                                                                      |
| <b>Supplementary Table 2.</b> Bond Lengths for complex 1.                                                                                                               |
| <b>Supplementary Table 3.</b> Bond angles for complex 1.                                                                                                                |
| <b>Supplementary Table 4.</b> Torsion angles for complex 1.                                                                                                             |
| <b>Supplementary Table 5.</b> Hydrogen Atom Coordinates ( $\text{\AA}\times 10^4$ ) and Isotropic Displacement Parameters ( $\text{\AA}^2\times 10^3$ ) for complex 1.  |
| <b>Supplementary Figure 2.</b> $^1\text{H}$ NMR spectrum of complex 1.                                                                                                  |
| <b>Supplementary Figure 3.</b> $^{13}\text{C}$ NMR spectrum of complex 1.                                                                                               |
| <b>Supplementary Figure 4.</b> PXRD patterns of complex 1.                                                                                                              |
| <b>Supplementary Figure 5.</b> IR spectrum of complex 1.                                                                                                                |
| <b>Supplementary Figure 6.</b> Single-crystal X-ray structure of complex 2.                                                                                             |
| <b>Supplementary Table 6.</b> Crystal data and structure refinement for complex 2.                                                                                      |
| <b>Supplementary Table 7.</b> Bond Lengths for complex 2.                                                                                                               |
| <b>Supplementary Table 8.</b> Bond angles for complex 2.                                                                                                                |
| <b>Supplementary Table 9.</b> Torsion angles for complex 2.                                                                                                             |
| <b>Supplementary Table 10.</b> Hydrogen Atom Coordinates ( $\text{\AA}\times 10^4$ ) and Isotropic Displacement Parameters ( $\text{\AA}^2\times 10^3$ ) for complex 2. |
| <b>Supplementary Figure 7.</b> $^1\text{H}$ NMR spectrum of complex 2.                                                                                                  |
| <b>Supplementary Figure 8.</b> PXRD patterns of complex 2.                                                                                                              |
| <b>Supplementary Figure 9.</b> IR spectrum of complex 2.                                                                                                                |
| <b>Supplementary Figure 10.</b> Single-crystal X-ray structure of complex 3.                                                                                            |
| <b>Supplementary Table 11.</b> Crystal data and structure refinement for complex 3.                                                                                     |
| <b>Supplementary Table 12.</b> Bond Lengths for complex 3.                                                                                                              |
| <b>Supplementary Table 13.</b> Bond angles for complex 3.                                                                                                               |
| <b>Supplementary Table 14.</b> Torsion angles for complex 3.                                                                                                            |
| <b>Supplementary Table 15.</b> Hydrogen Atom Coordinates ( $\text{\AA}\times 10^4$ ) and Isotropic Displacement Parameters ( $\text{\AA}^2\times 10^3$ ) for complex 3. |
| <b>Supplementary Figure 11.</b> PXRD patterns of complex 3.                                                                                                             |
| <b>Supplementary Figure 12.</b> IR spectrum of complex 3.                                                                                                               |
| <b>Supplementary Figure 13.</b> Optimized structures of complex 2.                                                                                                      |
| <b>Supplementary Figure 14.</b> Optimized structures of complex 3.                                                                                                      |
| <b>Supplementary Figure 15.</b> HOMO and LUMO orbitals of complex 2.                                                                                                    |
| <b>Supplementary Figure 16.</b> Electrostatic potential (ESP) of complex 2.                                                                                             |
| <b>Supplementary Figure 17.</b> Mulliken charge of complex 2.                                                                                                           |

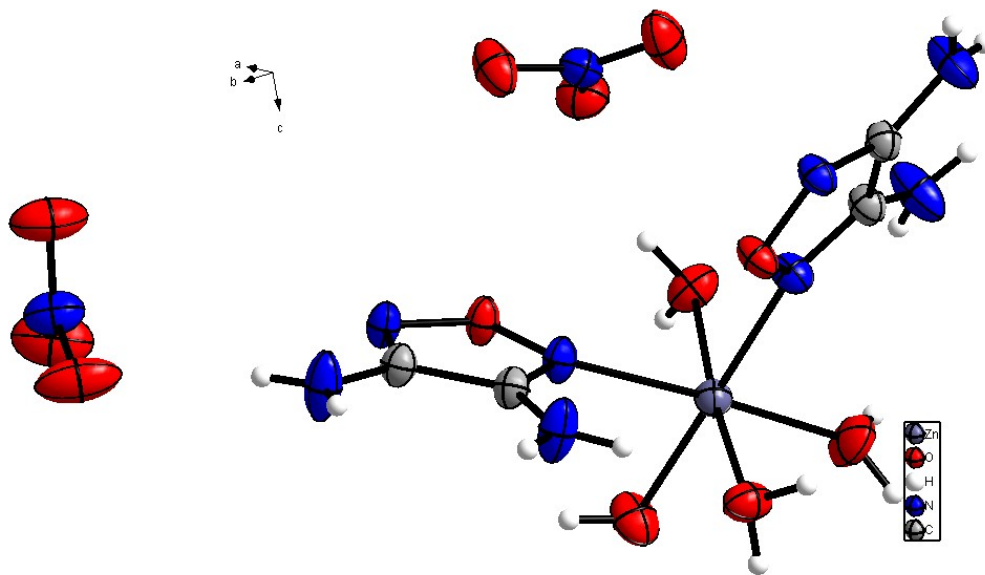

Supplementary Figure 1. Single-crystal X-ray structure of complex 1.

**Supplementary Table 1.** Crystal data and structure refinement for complex 1.

|                                                  |                                                    |
|--------------------------------------------------|----------------------------------------------------|
| CCDC                                             | 2104532                                            |
| Formula                                          | $C_2H_{13}N_6O_{11}Zn$                             |
| Mr                                               | 362.55                                             |
| crystal system                                   | monoclinic                                         |
| space group                                      | $P2_1/n$                                           |
| a [Å]                                            | 11.5599(2)                                         |
| b [Å]                                            | 8.4029(2)                                          |
| c [Å]                                            | 13.1796(4)                                         |
| $\alpha$ [Å]                                     | 90                                                 |
| $\beta$ [Å]                                      | 98.3160(10)                                        |
| $\gamma$ [Å]                                     | 90                                                 |
| V [Å <sup>3</sup> ]                              | 1266.76(5)                                         |
| Z                                                | 4                                                  |
| T [K]                                            | 296.15                                             |
| $\rho$ [g·cm <sup>-3</sup> ]                     | 1.901                                              |
| $\mu$ [mm <sup>-1</sup> ]                        | 2.010                                              |
| F(000)                                           | 740.0                                              |
| $\theta$ [°]                                     | 5.066 to 52.198                                    |
| index range                                      | -14 ≤ h ≤ 14                                       |
|                                                  | -10 ≤ k ≤ 10                                       |
|                                                  | -16 ≤ l ≤ 16                                       |
| reflections collected                            | 14447                                              |
| independent reflections                          | 2520 [ $R_{int} = 0.0227$ , $R_{sigma} = 0.0145$ ] |
| data/restraints/parameters                       | 2520/18/222                                        |
| GOF on F <sup>2</sup>                            | 1.086                                              |
| R <sub>1</sub> [ I > 2σ(I) ]                     | 0.0231                                             |
| wR <sub>2</sub> [ I > 2σ(I) ]                    | 0.0619                                             |
| R <sub>1</sub> (all data)                        | 0.0256                                             |
| wR <sub>2</sub> (all data)                       | 0.0634                                             |
| largest diff. peak and hole [e Å <sup>-3</sup> ] | 0.29/-0.84                                         |

**Supplementary Table 2.** Bond Lengths for complex 1.

| Bond                   | Length/Å   |
|------------------------|------------|
| Zn01-O003              | 2.0942(14) |
| Zn01-O004              | 2.0618(14) |
| Zn01-O006              | 2.0511(14) |
| Zn01-O008              | 2.0930(15) |
| Zn01-N009              | 2.1424(15) |
| Zn01-N00A <sup>1</sup> | 2.1990(15) |
| O1-N009                | 1.3917(19) |
| O1-N00A                | 1.3959(19) |
| O005-N00E              | 1.252(2)   |
| O007-N00E              | 1.242(2)   |
| N009-C00H              | 1.297(2)   |
| N00A-C00J              | 1.300(2)   |
| O00B-N00E              | 1.243(2)   |
| O00C-N00F              | 1.230(11)  |
| O00D-N00F              | 1.220(3)   |
| N00F-O00K              | 1.266(7)   |
| N00F-O2                | 1.243(9)   |
| N00F-O00L              | 1.243(6)   |
| N00G-C00H              | 1.335(3)   |
| C00H-C00J              | 1.451(3)   |
| N00I-C00J              | 1.331(3)   |

**Supplementary Table 3.** Bond angles for complex 1.

| Bond                        | Angle/°    |
|-----------------------------|------------|
| O003-Zn01-N009              | 87.17(6)   |
| O003-Zn01-N00A <sup>1</sup> | 94.16(6)   |
| O004-Zn01-O003              | 174.85(6)  |
| O004-Zn01-O008              | 91.78(7)   |
| O004-Zn01-N009              | 89.42(6)   |
| O004-Zn01-N00A <sup>1</sup> | 89.78(6)   |
| O006-Zn01-O003              | 94.56(6)   |
| O006-Zn01-O004              | 88.96(6)   |
| O006-Zn01-O008              | 88.81(7)   |
| O006-Zn01-N009              | 177.64(6)  |
| O006-Zn01-N00A <sup>1</sup> | 86.82(6)   |
| O008-Zn01-O003              | 84.55(6)   |
| O008-Zn01-N009              | 92.96(7)   |
| O008-Zn01-N00A <sup>1</sup> | 175.33(7)  |
| N009-Zn01-N00A <sup>1</sup> | 91.46(6)   |
| N009-O1-N00A                | 108.96(12) |
| O1-N009-Zn01                | 116.00(10) |
| C00H-N009-Zn01              | 136.70(13) |
| C00H-N009-O1                | 107.30(14) |
| C00J-N00A-O1                | 107.00(14) |
| O007-N00E-O00B              | 120.55(18) |
| O00B-N00E-O005              | 119.18(18) |
| O00C-N00F-O00K              | 117.3(12)  |
| O00D-N00F-O00C              | 124.1(11)  |
| O00D-N00F-O00K              | 118.0(6)   |
| O00D-N00F-O2                | 120.0(9)   |
| O00D-N00F-O00L              | 119.2(5)   |
| O2-N00F-O00L                | 119.9(10)  |
| N009-C00H-N00G              | 125.81(18) |
| N009-C00H-C00J              | 108.35(16) |
| N00G-C00H-C00J              | 125.79(18) |
| N00A-C00J-C00H              | 108.38(16) |
| N00A-C00J-N00I              | 125.56(18) |
| N00I-C00J-C00H              | 126.06(18) |

**Supplementary Table 4.** Torsion angles for complex 1.

| Bond                              | Torsion angle/° |
|-----------------------------------|-----------------|
| Zn01-N009-C00H-N00G               | 2.5(3)          |
| Zn01-N009-C00H-C00J               | -179.75(14)     |
| Zn01 <sup>1</sup> -N00A-C00J-C00H | -160.20(14)     |
| Zn01 <sup>1</sup> -N00A-C00J-N00I | 19.6(3)         |
| O1-N009-C00HN00G                  | -177.3(2)       |
| O1-N009-C00H-C00J                 | 0.4(2)          |
| O1-N00A-C00J-C00H                 | -0.7(2)         |
| O1-N00A-C00J-N00I                 | 179.1(2)        |
| N009-O1-N00A-Zn01 <sup>1</sup>    | 165.40(11)      |
| N009-O1-N00A-C00J                 | 1.02(19)        |
| N009-C00H-C00J-N00A               | 0.2(2)          |
| N009-C00H-C00J-N00I               | -179.6(2)       |
| N00A-O1-N009-Zn01                 | 179.24(11)      |
| N00A-O1-N009-C00H                 | -0.90(19)       |
| N00G-C00H-C00J-N00A               | 177.9(2)        |
| N00G-C00H-C00J-N00I               | -1.9(4)         |

**Supplementary Table 5.** Hydrogen Atom Coordinates ( $\text{\AA}\times 10^4$ ) and Isotropic Displacement Parameters ( $\text{\AA}^2\times 10^3$ ) for complex **1**.

| Atom | x        | y        | z        | U(eq) |
|------|----------|----------|----------|-------|
| H00A | 5138.01  | 9985.57  | 7897.06  | 51    |
| H00B | 4401.18  | 9240.51  | 8444.55  | 51    |
| H00C | 3514.89  | 7247.56  | 4855.83  | 51    |
| H00D | 3396.26  | 5930.43  | 5413.12  | 51    |
| H00E | 4649.47  | 10689.99 | 6102.99  | 60    |
| H00F | 3478.64  | 10646.78 | 5811.14  | 60    |
| H00G | 6309.69  | 7663.08  | 6758.13  | 66    |
| H00H | 5870.53  | 7061.19  | 5838.01  | 66    |
| H00K | 3710(20) | 1960(30) | 9340(20) | 37(7) |
| H00L | 4770(20) | 2590(30) | 9410(20) | 36(7) |
| H00I | 5920(20) | 6110(40) | 8310(20) | 50(8) |
| H00J | 6020(30) | 4670(40) | 8830(20) | 54(8) |

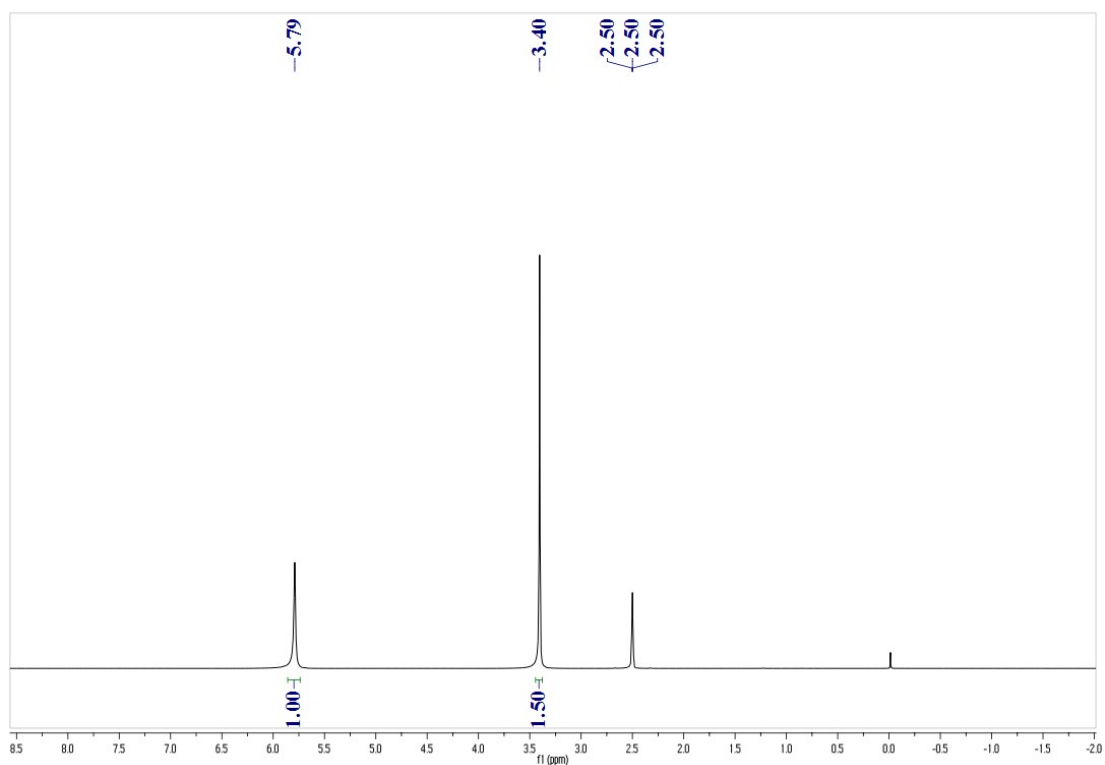

Supplementary Figure 2.  $^1\text{H}$  NMR spectrum of complex 1.

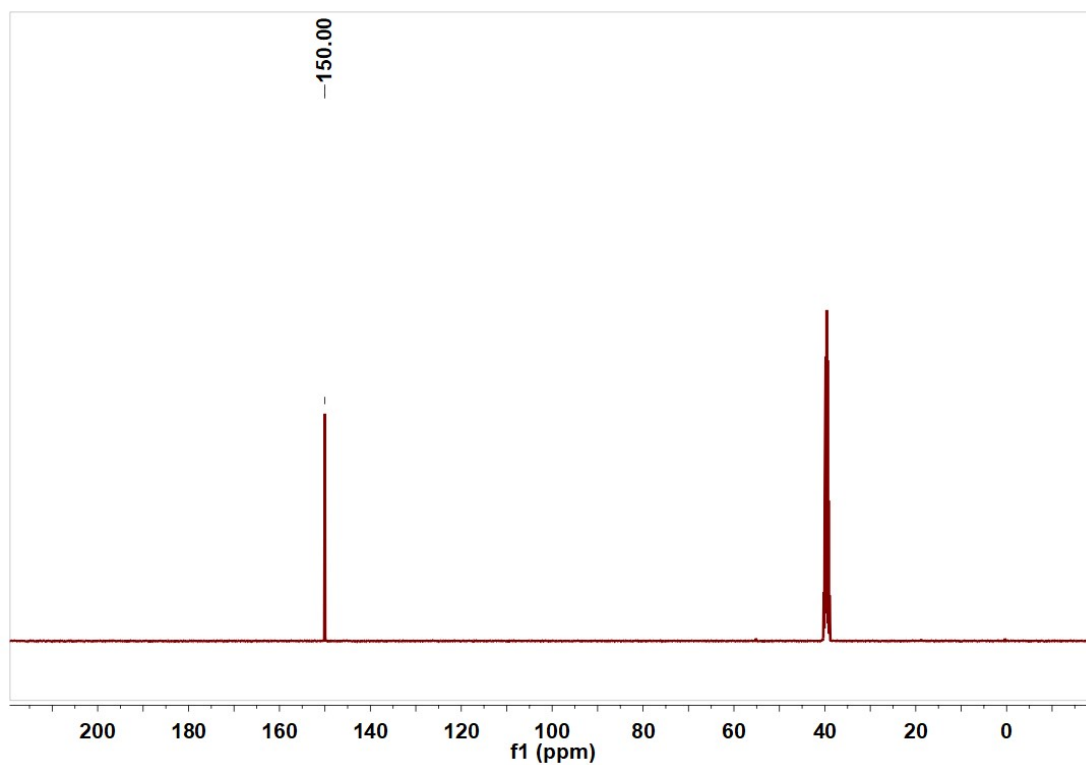

Supplementary Figure 3.  $^{13}\text{C}$  NMR spectrum of complex 1.



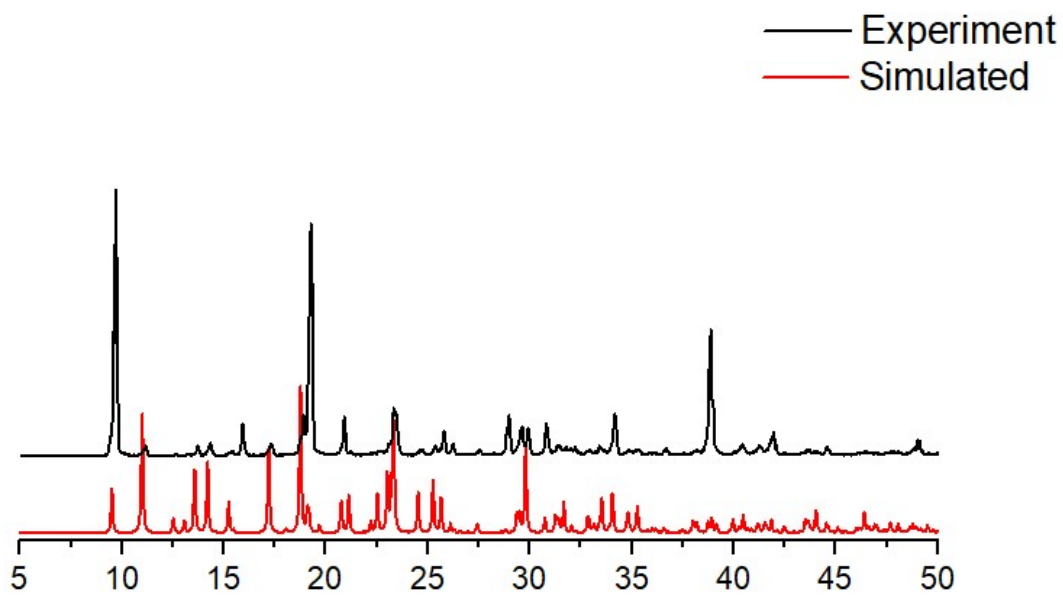

Supplementary Figure 4. PXRD patterns of complex 1.

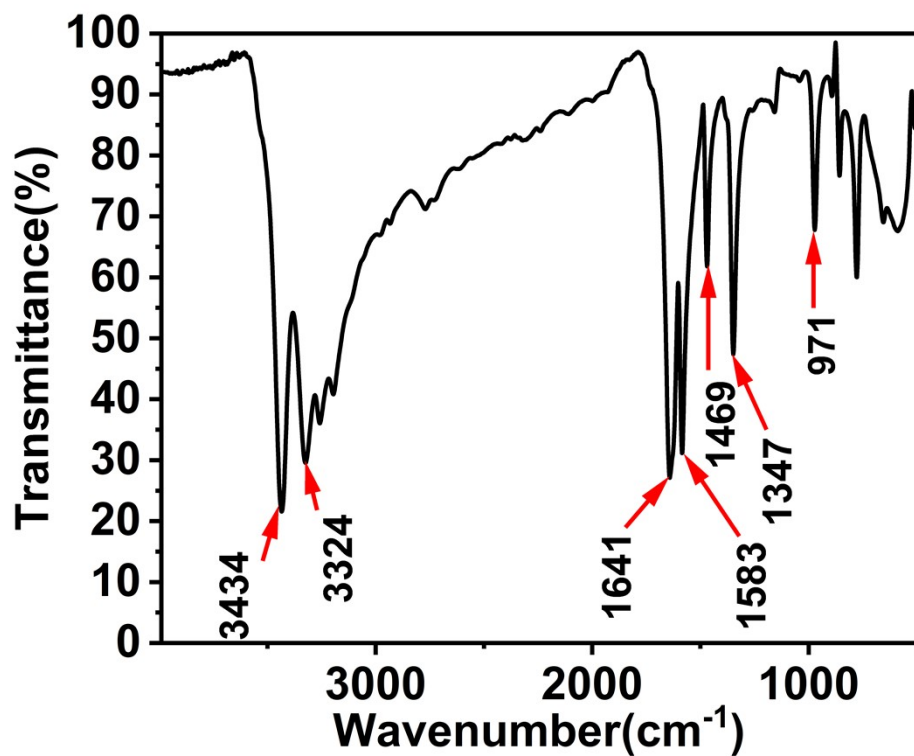

Supplementary Figure 5. IR spectrum of complex 1.

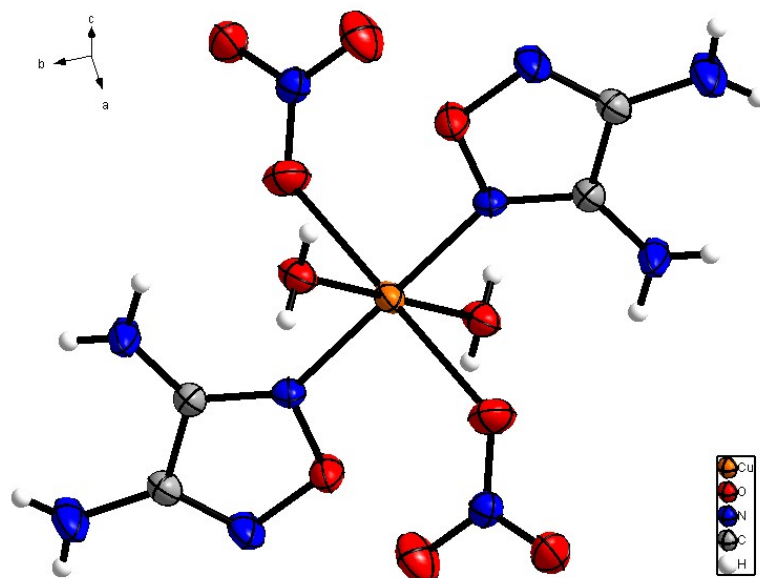

**Supplementary Table 6.** Crystal data and structure refinement for complex 2.

|                                                  |                                                                  |
|--------------------------------------------------|------------------------------------------------------------------|
|                                                  |                                                                  |
| Formula                                          | C <sub>4</sub> H <sub>12</sub> CuN <sub>10</sub> O <sub>10</sub> |
| Mr                                               | 423.78                                                           |
| crystal system                                   | monoclinic                                                       |
| space group                                      | P2 <sub>1</sub> /c                                               |
| a [Å]                                            | 6.3745(3)                                                        |
| b [Å]                                            | 16.2753(9)                                                       |
| c [Å]                                            | 7.2274(4)                                                        |
| α [Å]                                            | 90                                                               |
| β [Å]                                            | 109.429(2)                                                       |
| γ [Å]                                            | 90                                                               |
| V [Å <sup>3</sup> ]                              | 707.12(7)                                                        |
| Z                                                | 2                                                                |
| T [K]                                            | 296.15                                                           |
| ρ[g·cm <sup>-3</sup> ]                           | 1.990                                                            |
| μ[mm <sup>-1</sup> ]                             | 1.628                                                            |
| F(000)                                           | 430.0                                                            |
| θ [°]                                            | 6.48 to 55.18                                                    |
| index range                                      | -8 ≤ h ≤ 7                                                       |
|                                                  | -16 ≤ k ≤ 21                                                     |
|                                                  | -9 ≤ l ≤ 6                                                       |
| reflections collected                            | 3928                                                             |
| independent reflections                          | 1632 [R <sub>int</sub> = 0.0519, R <sub>sigma</sub> = 0.0343]    |
| data/restraints/parameters                       | 1632/0/139                                                       |
| GOF on F <sub>2</sub>                            | 1.023                                                            |
| R <sub>1</sub> [ I > 2σ(I) ]                     | 0.0263                                                           |
| wR <sub>2</sub> [ I > 2σ(I) ]                    | 0.0670                                                           |
| R <sub>1</sub> (all data)                        | 0.0317                                                           |
| wR <sub>2</sub> (all data)                       | 0.0690                                                           |
| largest diff. peak and hole [e Å <sup>-3</sup> ] | 0.42/-0.33                                                       |

**Supplementary Table 7.** Bond Lengths for complex 2.

| Bond                   | Length/Å   |
|------------------------|------------|
| Cu01-O1                | 1.9564(13) |
| Cu01-O1 <sup>1</sup>   | 1.9564(13) |
| Cu01-N006 <sup>1</sup> | 1.9863(14) |
| Cu01-N006              | 1.9862(14) |
| O003-N006              | 1.4065(17) |
| O003-N009              | 1.3944(19) |
| O004-N008              | 1.2639(19) |
| Cu01-N006 <sup>1</sup> | 1.9858(13) |
| O005-N008              | 1.2384(18) |
| N006-C00C              | 1.311(2)   |
| O007-N008              | 1.2254(19) |
| N009-C00D              | 1.286(2)   |
| N00A-C00C              | 1.330(2)   |
| N00B-C00D              | 1.352(2)   |
| C00C-C00D              | 1.449(2)   |



**Supplementary Table 8.** Bond angles for complex 2.

| Bond                                    | Angle/°    |
|-----------------------------------------|------------|
| O1-Cu01-O1 <sup>1</sup>                 | 180.0      |
| O1 <sup>1</sup> -Cu01-N006              | 88.15(6)   |
| O1-Cu01-N006                            | 91.85(6)   |
| O1 <sup>1</sup> -Cu01-N006 <sup>1</sup> | 91.85(6)   |
| O1-Cu01-N006 <sup>1</sup>               | 88.15(6)   |
| N006-Cu01-N006 <sup>1</sup>             | 180.0      |
| N009-O003-N006                          | 109.11(12) |
| O003-N006-Cu01                          | 116.56(10) |
| C00C-N006-Cu01                          | 136.65(11) |
| C00C-N006-O003                          | 106.66(12) |
| O005-N008-O004                          | 118.47(15) |
| O007-N00-O004                           | 120.12(15) |
| O007-N008-O005                          | 121.39(15) |
| C00D-N009-O003                          | 106.81(13) |
| N006-C00C-N00A                          | 126.37(15) |
| N00A-C00C-C00D                          | 126.01(16) |
| N006-C00C-C00D                          | 107.62(14) |
| N009-C00D-N00B                          | 125.09(17) |
| N009-C00D-C00C                          | 109.77(15) |
| N00B-C00D-C00C                          | 125.12(17) |

**Supplementary Table 9.** Torsion angles for complex 2.

| Bond                | Torsion angle/° |
|---------------------|-----------------|
| Cu01-N006-C00C-N00A | 3.4(3)          |
| Cu01-N006-C00C-C00D | -177.15(13)     |
| O003-N006-C00C-N00A | 178.92(18)      |
| O003-N006-C00C-C00D | -1.65(19)       |
| O003-N009 C00D-N00B | -178.33(18)     |
| O003-N009-C00D-C00C | 0.2(2)          |
| N006-O003-N009-C00D | -1.26(19)       |
| N006-C00C-C00D-N009 | 0.9(2)          |
| N006-C00C-C00D-N00B | 179.50(19)      |
| N009-O003-N006-Cu01 | 178.39(10)      |
| N009-O003-N006-C00C | 1.85(19)        |
| N00A-C00C-C00D-N009 | -179.63(19)     |
| N00A-C00C-C00D-N00B | -1.1(3)         |

**Supplementary Table 10.** Hydrogen Atom Coordinates ( $\text{\AA} \times 10^4$ ) and Isotropic Displacement Parameters ( $\text{\AA}^2 \times 10^3$ ) for complex **2**.

| Atom | x        | y        | z        | U(eq) |
|------|----------|----------|----------|-------|
| H00A | 7070(40) | 3121(14) | 5600(30) | 31(6) |
| H00C | 2820(40) | 1595(15) | 5660(40) | 40(7) |
| H00B | 6130(40) | 2390(17) | 5640(30) | 37(7) |
| H00D | 710(50)  | 1693(15) | 5300(30) | 36(6) |
| H1A  | 1230(50) | 5234(17) | 2890(40) | 47(8) |
| H1B  | 2440(50) | 5565(18) | 2180(40) | 55(9) |

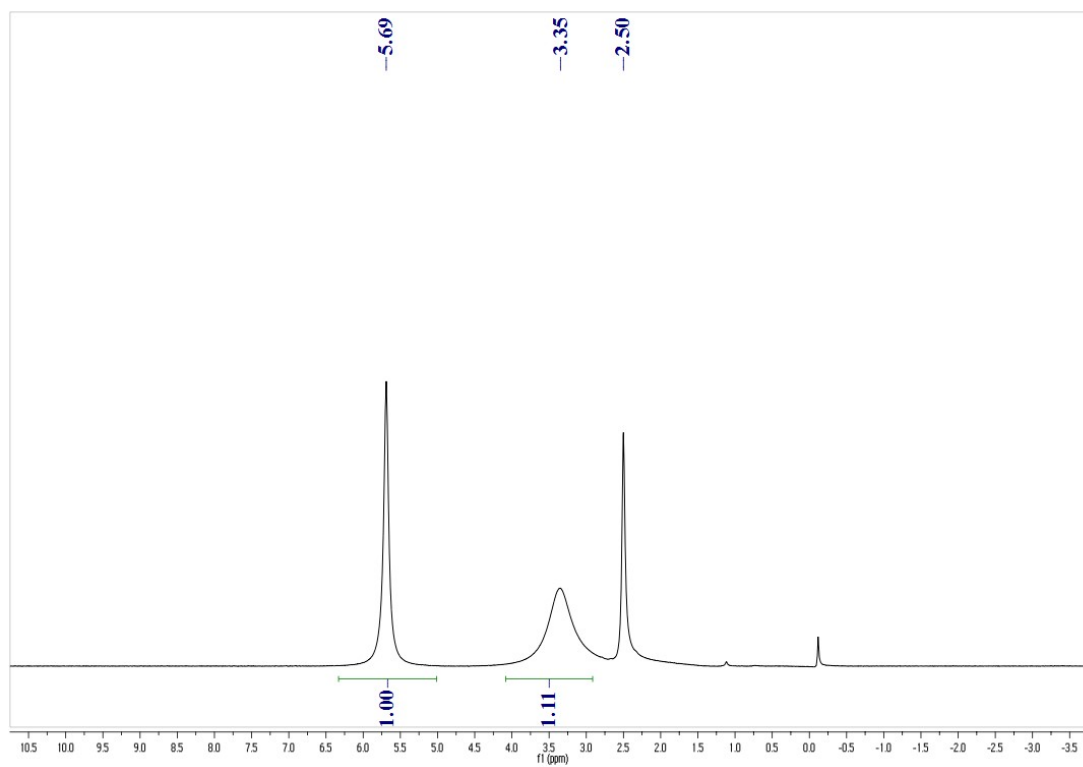

**Supplementary Figure 7.**  $^1\text{H}$  NMR spectrum of complex **2**.



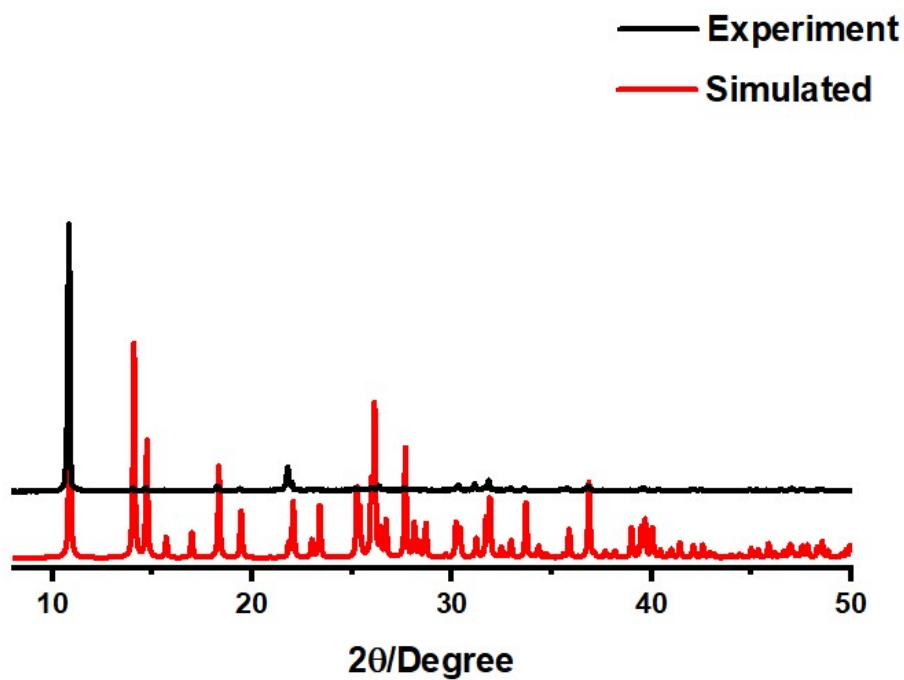

Supplementary Figure 8. PXRD patterns of complex 2.

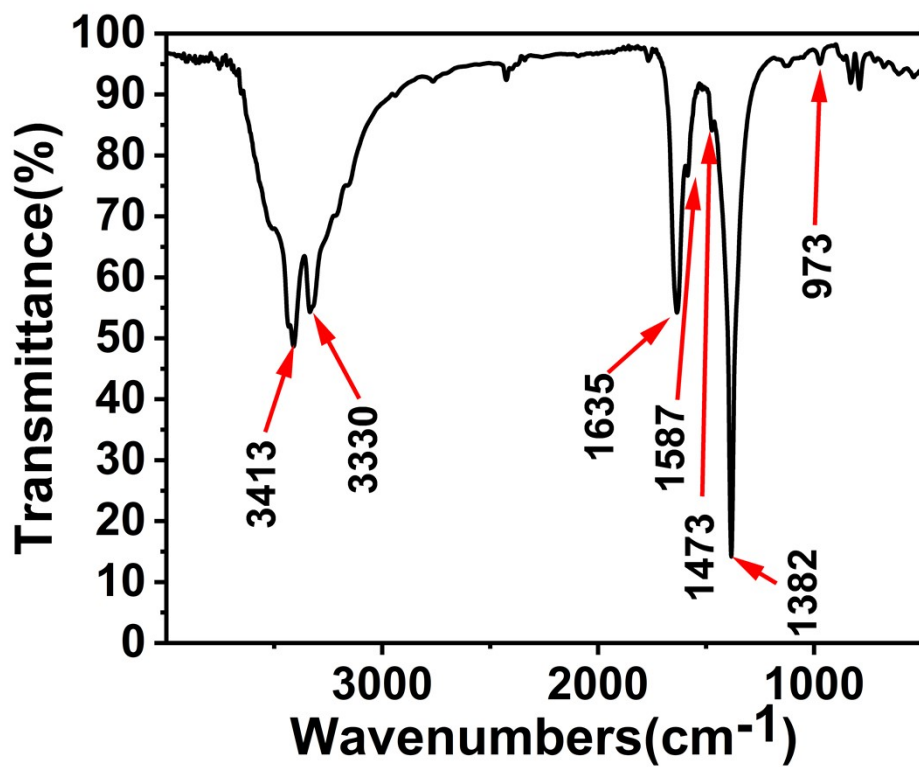

Supplementary Figure 9. IR spectrum of complex 2.

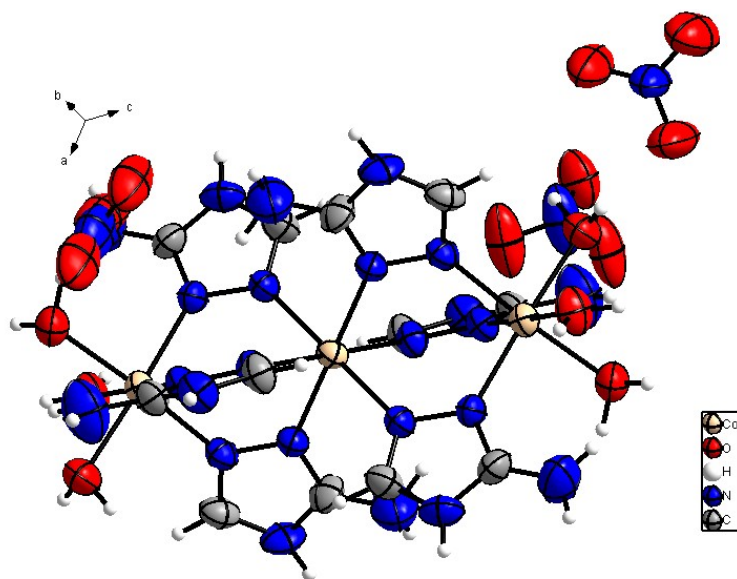

Supplementary Figure 10. Single-crystal X-ray structure of complex 3.

**Supplementary Table 11.** Crystal data and structure refinement for complex **3**.

|                                                  |                                                                                 |
|--------------------------------------------------|---------------------------------------------------------------------------------|
| Formula                                          | C <sub>12</sub> H <sub>40</sub> Co <sub>3</sub> N <sub>30</sub> O <sub>26</sub> |
| Mr                                               | 1197.53                                                                         |
| crystal system                                   | monoclinic                                                                      |
| space group                                      | P2 <sub>1</sub> /n                                                              |
| a [Å]                                            | 13.2909(18)                                                                     |
| b [Å]                                            | 12.1643(16)                                                                     |
| c [Å]                                            | 14.587(2)                                                                       |
| α [°]                                            | 90                                                                              |
| β [°]                                            | 113.269(7)                                                                      |
| γ [°]                                            | 90                                                                              |
| V [Å <sup>3</sup> ]                              | 2166.5(6)                                                                       |
| Z                                                | 2                                                                               |
| T [K]                                            | 296(2)                                                                          |
| ρ [g·cm <sup>-3</sup> ]                          | 1.836                                                                           |
| μ [mm <sup>-1</sup> ]                            | 1.258                                                                           |
| F(000)                                           | 1222.0                                                                          |
| θ [°]                                            | 8.684 to 55.258                                                                 |
| index range                                      | -17 ≤ h ≤ 17                                                                    |
|                                                  | -15 ≤ k ≤ 11                                                                    |
|                                                  | -17 ≤ l ≤ 19                                                                    |
| reflections collected                            | 10807                                                                           |
| independent reflections                          | 4938 [R <sub>int</sub> = 0.0376, R <sub>sigma</sub> = 0.0608]                   |
| data/restraints/parameters                       | 4938/275/391                                                                    |
| GOF on F <sup>2</sup>                            | 1.030                                                                           |
| R <sub>1</sub> [ I > 2σ(I) ]                     | 0.0716                                                                          |
| wR <sub>2</sub> [ I > 2σ(I) ]                    | 0.2025                                                                          |
| R <sub>1</sub> (all data)                        | 0.1206                                                                          |
| wR <sub>2</sub> (all data)                       | 0.2349                                                                          |
| largest diff. peak and hole [e Å <sup>-3</sup> ] | 1.94/-0.54                                                                      |

**Supplementary Table 12.** Bond Lengths for complex 3.

| Bond                   | Length/Å  |
|------------------------|-----------|
| Co01-N008 <sup>1</sup> | 2.132(4)  |
| Co01-N008              | 2.132(4)  |
| Co01-N007 <sup>1</sup> | 2.124(4)  |
| Co01-N007              | 2.124(4)  |
| Co01-N009              | 2.170(5)  |
| Co01-N0091             | 2.170(5)  |
| Co02-N006              | 2.095(4)  |
| Co02-O4                | 2.093(4)  |
| Co02-N00B              | 2.095(4)  |
| Co02-N00A              | 2.106(4)  |
| Co02-O3                | 2.121(4)  |
| Co02-O                 | 2.133(4)  |
| N006-C00H              | 1.326(7)  |
| N006-N008              | 1.393(6)  |
| N007-C00G              | 1.306(7)  |
| N007-N00A              | 1.402(6)  |
| N008-C00J              | 1.307(7)  |
| N009-C00K              | 1.310(7)  |
| N009-N00B              | 1.363(6)  |
| N00A-C00I              | 1.306(7)  |
| N00B-C00P              | 1.297(7)  |
| N00C-C00J              | 1.344(8)  |
| N00C-C00H              | 1.342(8)  |
| N00D-C00P              | 1.334(8)  |
| N00D-C00K              | 1.354(8)  |
| N00E-C00G              | 1.327(8)  |
| N00E-C00I              | 1.323(8)  |
| C00G-N00V              | 1.316(9)  |
| C00H-N00T              | 1.322(9)  |
| N00L-O00O              | 1.208(7)  |
| N00L-O00S              | 1.239(8)  |
| N00L-O00M              | 1.222(8)  |
| C00P-N00Y              | 1.330(10) |
| N00U-O00Z              | 1.130(12) |
| N00U-O00W              | 1.173(10) |
| N00U-O00X              | 1.478(16) |
| N00U-O00Y              | 1.471(19) |
| N00U-O7                | 1.197(18) |
| N3-O5                  | 1.235(10) |
| N3-O2                  | 1.239(10) |
| N3-O1                  | 1.257(11) |

|        |           |
|--------|-----------|
| N3-O1A | 1.234(18) |
| N3-O2A | 1.202(17) |
| N3-O5A | 1.230(19) |

Supplementary Table 13. Bond angles for complex 3.

| Bond                                      | Angle/°    | Bond           | Angle/°   |
|-------------------------------------------|------------|----------------|-----------|
| N007 <sup>1</sup> -Co01-N007              | 180        | N00B-N009-Co01 | 124.8(3)  |
| N007-Co01-N008                            | 90.04(17)  | C00K-N009-Co01 | 128.4(4)  |
| N007-Co01-N008 <sup>1</sup>               | 89.97(17)  | C00K-N009-N00B | 106.4(4)  |
| N007 <sup>1</sup> -Co01-N008              | 89.97(17)  | N007-N00A-Co02 | 124.2(3)  |
| N007 <sup>1</sup> -Co01-N008 <sup>1</sup> | 90.03(17)  | C00I-N00A-Co02 | 130.2(4)  |
| N007-Co01-N009                            | 90.38(17)  | C00I-N00A-N007 | 105.6(5)  |
| N007-Co01-N009 <sup>1</sup>               | 89.62(17)  | N009-N00B-Co02 | 123.4(3)  |
| N007 <sup>1</sup> -Co01-N009 <sup>1</sup> | 90.38(17)  | C00P-N00B-Co02 | 129.3(4)  |
| N007 <sup>1</sup> -Co01-N009              | 89.62(17)  | C00P-N00B-N009 | 107.2(4)  |
| N008-Co01-N008 <sup>1</sup>               | 180        | C00H-N00C-C00J | 106.6(5)  |
| N008 <sup>1</sup> -Co01-N009              | 89.50(17)  | C00P-N00D-C00K | 105.9(5)  |
| N008-Co01-N009                            | 90.50(17)  | C00I-N00E-C00G | 105.9(5)  |
| N008-Co01-N009 <sup>1</sup>               | 89.50(17)  | N007-C00G-N00E | 111.0(5)  |
| N008 <sup>1</sup> -Co01-N009 <sup>1</sup> | 90.50(17)  | N007-C00G-N00V | 128.6(6)  |
| N009-Co01-N009 <sup>1</sup>               | 180        | N00V-C00G-N00E | 120.4(6)  |
| O4-Co02-O                                 | 86.65(19)  | N006-C00H-N00C | 110.0(5)  |
| O4-Co02-O3                                | 88.40(19)  | N00T-C00H-N006 | 127.2(6)  |
| O4-Co02-N006                              | 91.70(18)  | N00T-C00H-N00C | 122.7(6)  |
| O4-Co02-N00A                              | 90.80(18)  | N00A-C00I-N00E | 111.4(5)  |
| O4-Co02-N00B                              | 174.89(18) | N008-C00J-N00C | 109.8(5)  |
| O3-Co02-O                                 | 87.15(17)  | N009-C00K-N00D | 109.9(5)  |
| N006-Co02-O                               | 90.18(17)  | O00M-N00L-O00S | 119.9(6)  |
| N006-Co02-O3                              | 177.31(17) | O00O-N00L-O00M | 122.1(6)  |
| N006-Co02-N00A                            | 92.72(17)  | O00O-N00L-O00S | 117.6(7)  |
| N006-Co02-N00B                            | 92.86(17)  | N00B-C00P-N00D | 110.7(5)  |
| N00A-Co02-O                               | 176.19(17) | N00B-C00P-N00Y | 129.8(6)  |
| N00A-Co02-O3                              | 89.96(17)  | N00Y-C00P-N00D | 119.3(6)  |
| N00B-Co02-O                               | 91.03(18)  | O00W-N00U-O00X | 110.9(11) |
| N00B-Co02-O3                              | 86.94(18)  | O00Z-N00U-O00W | 136.8(13) |
| N00B-Co02-N00A                            | 91.29(17)  | O00Z-N00U-O00X | 110.9(11) |
| N008-N006-Co02                            | 123.9(3)   | O00{-N00U-O7   | 112(2)    |
| C00H-N006-Co02                            | 130.2(4)   | O00{-N00U-O00Y | 161(2)    |
| C00H-N006-N008                            | 105.9(4)   | O7-N00U-O00Y   | 86.2(17)  |
| N00A-N007-Co01                            | 124.5(3)   | O5-N3-O2       | 125.1(10) |
| C00G-N007-Co01                            | 129.4(4)   | O5-N3-O1       | 114.0(12) |
| C00G-N007-N00A                            | 106.0(4)   | O2-N3-O1       | 119.2(9)  |
| N006-N008-Co01                            | 125.0(3)   | O2A-N3-O5A     | 128(4)    |
| C00J-N008-Co01                            | 127.2(4)   | O2A-N3-O1A     | 110(2)    |
| C00J-N008-N006                            | 107.7(4)   | O5A-N3-O1A     | 112(4)    |

**Supplementary Table 14.** Torsion angles for complex 3.

| Bond                | Torsion angle/° |
|---------------------|-----------------|
| Co01-N007-N00A-Co02 | -0.7(6)         |
| Co01-N007-N00A-C00I | 179.2(4)        |
| Co01-N007-C00G-N00E | -179.5(4)       |
| Co01-N007-C00G-N00V | -2.5(11)        |
| Co01-N008-C00J-N00C | 176.6(4)        |
| Co01-N009-N00B-Co02 | 4.4(6)          |
| Co01-N009-N00B-C00P | -171.4(4)       |
| Co01-N009-C00K-N00D | 171.2(4)        |
| Co02-N006-N008-Co01 | 5.6(6)          |
| Co02-N006-N008-C00J | -177.9(4)       |
| Co02-N006-C00H-N00C | 177.1(4)        |
| Co02-N006-C00H-N00T | -0.6(10)        |
| Co02-N00A-C00I-N00E | 179.6(4)        |
| Co02-N00B-C00P-N00D | -176.6(4)       |
| Co02-N00B-C00P-N00Y | 9.1(11)         |
| N006-N008-C00J-N00C | 0.3(6)          |
| N007-N00A-C00I-N00E | -0.3(7)         |
| N008-N006-C00H-N00C | -1.4(6)         |
| N008-N006-C00H-N00T | -179.1(7)       |
| N009-N00B-C00P-N00D | -1.1(6)         |
| N009-N00B-C00P-N00Y | -175.4(8)       |
| N00A-N007-C00G-N00E | -1.4(7)         |
| N00A-N007-C00G-N00V | 175.6(7)        |
| N00B-N009-C00K-N00D | -1.3(6)         |
| C00G-N007-N00A-Co02 | -178.9(4)       |
| C00G-N007-N00A-C00I | 1.1(6)          |
| C00G-N00E-C00I-N00A | -0.5(7)         |
| C00H-N006-N008-Co01 | -175.8(4)       |
| C00H-N006-N008-C00J | 0.7(6)          |
| C00H-N00C-C00J-N008 | -1.1(7)         |
| C00I-N00E-C00G-N007 | 1.2(7)          |
| C00I-N00E-C00G-N00V | -176.0(7)       |
| C00J-N00C-C00H-N006 | 1.6(7)          |
| C00J-N00C-C00H-N00T | 179.4(7)        |
| C00K-N009-N00B-Co02 | 177.3(4)        |
| C00K-N009-N00B-C00P | 1.5(6)          |
| C00K-N00D-C00P-N00B | 0.3(7)          |
| C00K-N00D-C00P-N00Y | 175.3(7)        |
| C00P-N00D-C00K-N009 | 0.7(7)          |

**Supplementary Table 15.** Hydrogen Atom Coordinates ( $\text{\AA}\times 10^4$ ) and Isotropic Displacement Parameters ( $\text{\AA}^2\times 10^3$ ) for complex **3**.

| Atom | x        | y        | z        | U(eq)  |
|------|----------|----------|----------|--------|
| H4A  | 3018.8   | 1583.47  | 6896.72  | 96     |
| H4B  | 3075.65  | 1509.67  | 5999.24  | 96     |
| HA   | 5838.43  | 2291.85  | 8105.16  | 90     |
| HB   | 4887.35  | 1876.65  | 8215.3   | 90     |
| H3A  | 3036.69  | 4656.36  | 7419.84  | 94     |
| H3B  | 2654.97  | 3617.32  | 7469.31  | 94     |
| H00C | 6291.85  | 1076.24  | 5304.26  | 68     |
| H00D | 6279.37  | 6698.23  | 8462.46  | 64     |
| H00I | 1541.81  | 3858.76  | 5418.96  | 61     |
| H00J | 6162.92  | 2830.41  | 4522.38  | 62     |
| H00K | 6341.87  | 6749.95  | 6835.52  | 62     |
| H00A | 5074.97  | 943.71   | 6997.95  | 112    |
| H00B | 5721.64  | 258.01   | 6580.48  | 112    |
| H00F | 2838.68  | 5703.13  | 3131.93  | 121    |
| H00G | 1682.76  | 5691.94  | 2864.21  | 121    |
| H00H | 5051.01  | 4453.65  | 8949.94  | 133    |
| H00L | 5601.32  | 5504.95  | 9397.01  | 133    |
| H00E | 1000(40) | 5080(50) | 3820(40) | 70(20) |
| H6A  | 7777.5   | 8356.43  | 11810.34 | 134    |
| H6B  | 8023.56  | 8556.46  | 12781.25 | 134    |



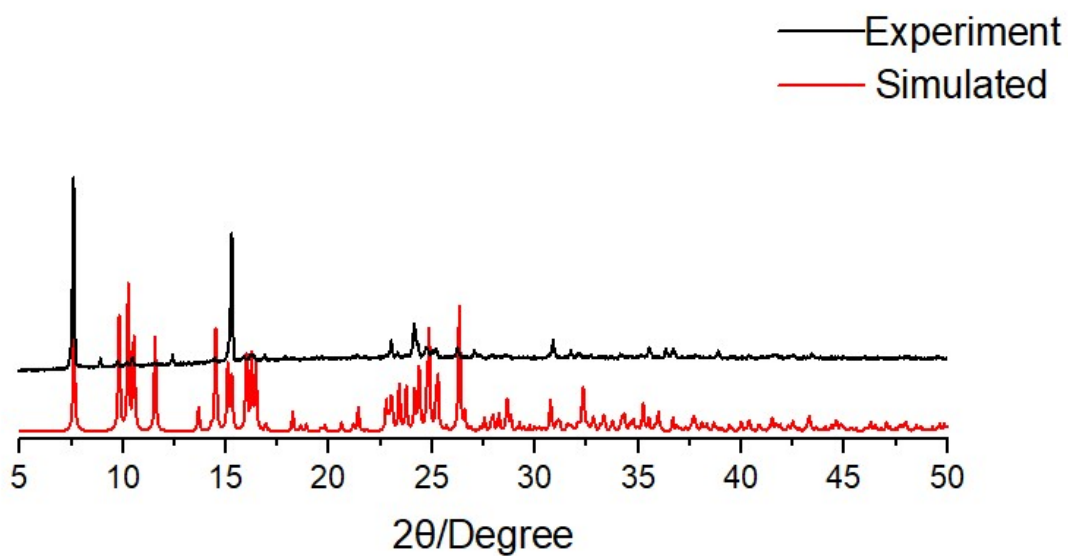

Supplementary Figure 11. PXRD patterns of complex 3.

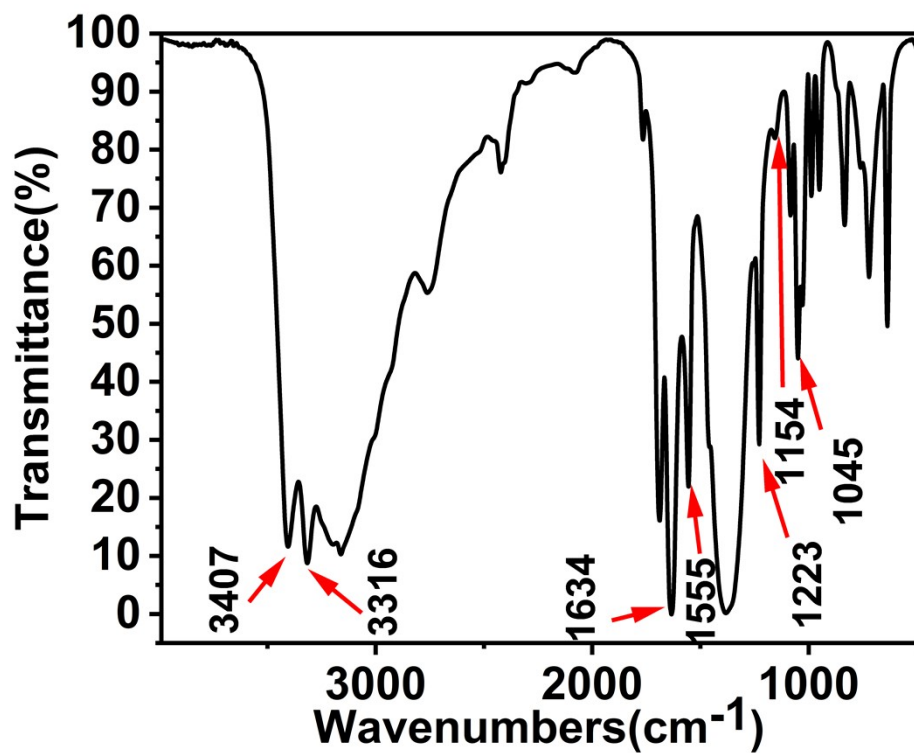

Supplementary Figure 12. IR spectrum of complex 3.

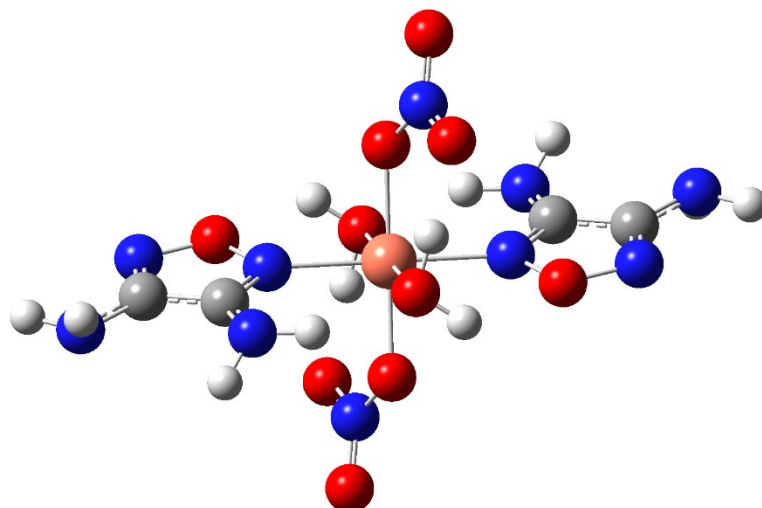

**Supplementary Figure 13.** Optimized structures of complex 2.

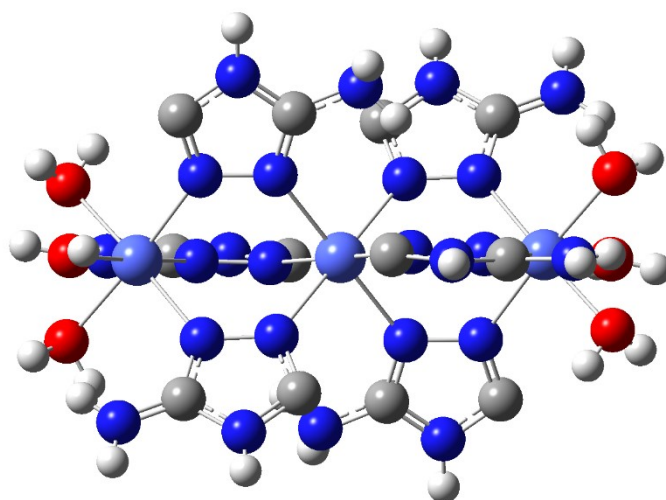

**Supplementary Figure 14.** Optimized structures of complex 3.

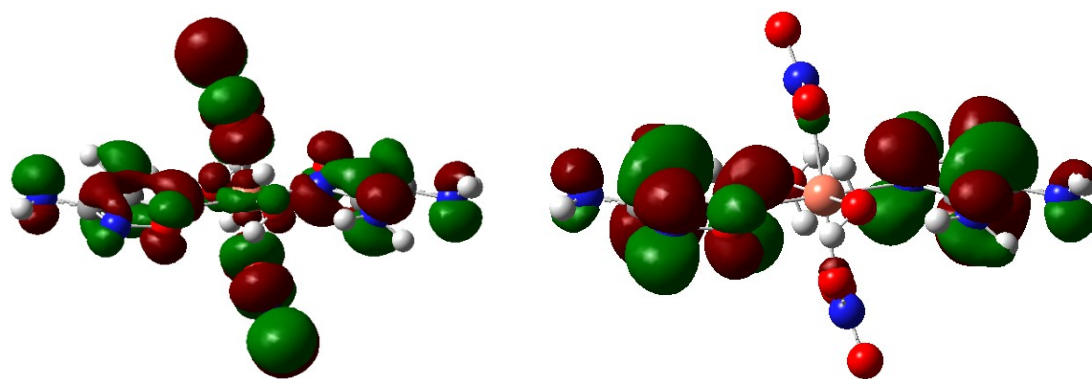

Supplementary Figure 15. HOMO (left) and LUMO (right) orbitals of complex 2.

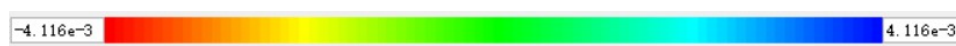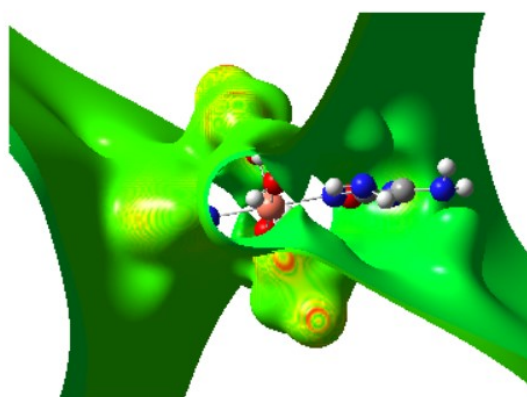

Supplementary Figure 16. Electrostatic potential (ESP) of complex 2.

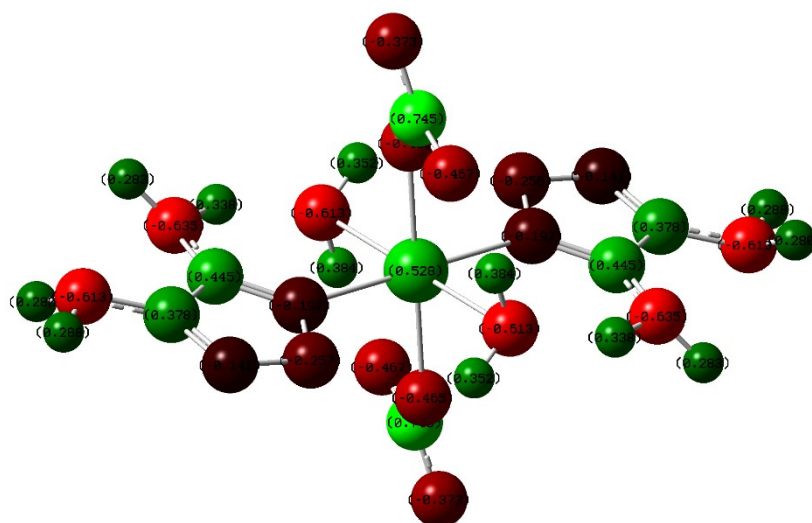

Supplementary Figure 17. Mulliken charge of complex 2.
